# Supplementary material for: Dual inhibition of EGFR at protein and activity level via combinatorial blocking of PI4KIIα as anti-tumor strategy
Source: PubMed Central journal article supplement (PMC4026421; doi:10.1007/s13238-014-0055-y), 2014-05-07
Supplement: 13238_2014_55_MOESM1_ESM.pdf [file 13238_2014_55_MOESM1_ESM.pdf]

# Supporting Information

## Dual inhibition of EGFR at protein and activity level via combinatorial blocking of PI4KII $\alpha$ as anti-tumor strategy

Jiangmei Li<sup>1</sup>, Lunfeng Zhang<sup>1,2</sup>, Zhen Gao<sup>1,2</sup>, Hua Kang<sup>3</sup>, Guohua Rong<sup>3</sup>, Xu Zhang<sup>4</sup>, Chang Chen<sup>1\*</sup>

<sup>1</sup> National Laboratory of Biomacromolecules, Institute of Biophysics, Chinese Academy of Sciences, Beijing, China;

<sup>2</sup> University of Chinese Academy of Sciences, Beijing, China

<sup>3</sup> Department of General Surgery, Xuanwu Hospital, Capital Medical University, Beijing, China;

<sup>4</sup> Tianjin Research Center of Basic Medical Science, Tianjin Medical University, Tianjin, China;

\*Correspondence should be addressed to: Chang Chen, National Laboratory of Biomacromolecules, Institute of Biophysics, Chinese Academy of Sciences, 15 Datun Road, Chaoyang District, Beijing 100101, PR China. E-mail: [changchen@moon.ibp.ac.cn](mailto:changchen@moon.ibp.ac.cn). Tel: 86-010-64888406. Fax: 86-010-64871293

**Running Title:** PI4KII $\alpha$ , an ideal combinatorial target for EGFR treatment

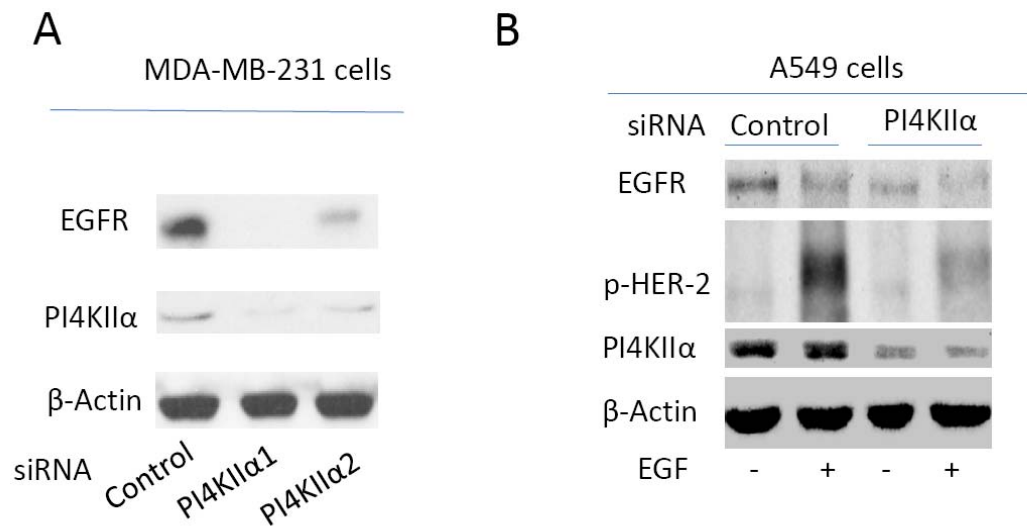

**Figure S1. Effect of PI4KIIα knockdown in different cell lines on EGFR protein levels. A)** MDA-MB-231 cells. **B)** A549 cells. Cells were transfected with either control siRNA or PI4KIIα siRNA (PI4KIIα 1 and PI4KIIα 2 refer to siRNA targeting different site of the PI4KIIα mRNA) for 72 hours, and then treated 100 ng/ml EGF for 10 minutes, except controls, and proteins indicated measured by Western blot. All results presented above represent data from three independent experiments.

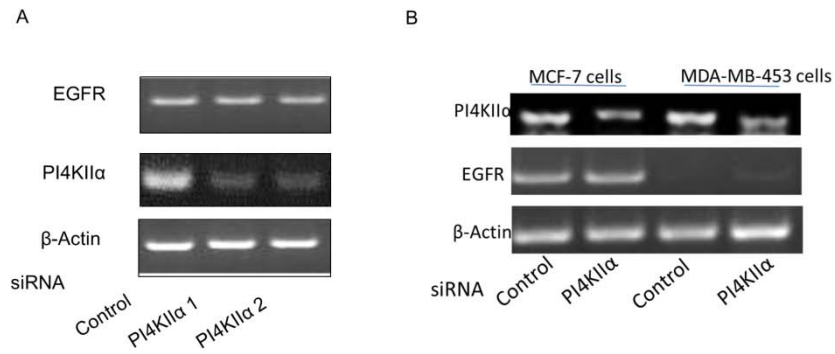

**Figure S2. PI4KII $\alpha$  knockdown not affect EGFR transcription level.** A) MCF-7 cells were transfected with control siRNA or two different PI4KII $\alpha$  siRNAs for 72 hours. mRNA levels of EGFR and PI4KII $\alpha$ . B) MCF-7 cells and MDA-MB-435 cells were transfected with control or PI4KII $\alpha$  siRNA for 72 hours, and levels of EGFR and PI4KII $\alpha$  mRNA measured.

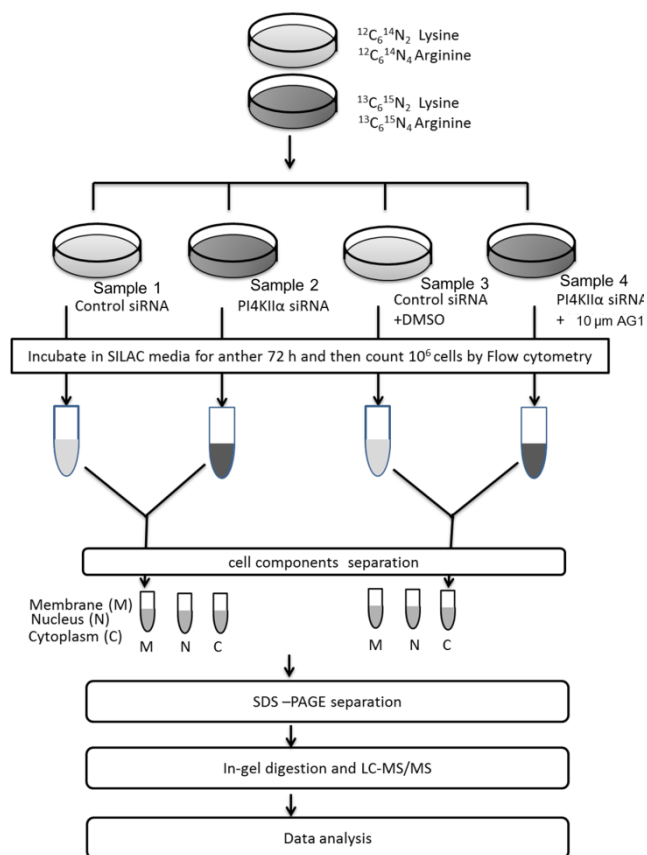

**Figure S3. Proteomics analysis of molecular networks affected by PI4KII $\alpha$  knockdown or dual inhibition by SILAC and LC-MS/MS.** Schematic flowchart for the discovery of molecular networks regulated by PI4K and EGFR dual inhibition in MCF-7 cells. Detailed information was described in method section.

**Table S1. Protein targets identified by SILAC and LC-MS/MS for control RNAi MCF-7 cells (sample 1) and PI4KII $\alpha$  RNAi MCF-7 cells (sample 2).**

| Accession     | Description                                                              | Heavy/Light* |
|---------------|--------------------------------------------------------------------------|--------------|
| <b>O94776</b> | Metastasis-associated protein MTA2                                       | 0.22         |
| <b>P04040</b> | Catalase                                                                 | 0.24         |
| <b>P14923</b> | Junction plakoglobin                                                     | 0.26         |
| <b>Q08945</b> | FACT complex subunit SSRP1                                               | 0.26         |
| <b>Q9UMS4</b> | Pre-mRNA-processing factor 19                                            | 0.26         |
| <b>P12270</b> | Nucleoprotein TPR                                                        | 0.26         |
| <b>P08670</b> | Vimentin                                                                 | 0.27         |
| <b>P09874</b> | Poly [ADP-ribose] polymerase 1                                           | 0.28         |
| <b>Q9BTV4</b> | Transmembrane protein 43                                                 | 0.29         |
| <b>Q14690</b> | Protein RRP5 homolog                                                     | 0.30         |
| <b>Q15269</b> | Periodic tryptophan protein 2 homolog                                    | 0.31         |
| <b>P14866</b> | Heterogeneous nuclear ribonucleoprotein L                                | 0.32         |
| <b>P23246</b> | Splicing factor, proline- and glutamine-rich                             | 0.32         |
| <b>Q9BQ39</b> | ATP-dependent RNA helicase DDX50                                         | 0.33         |
| <b>O43143</b> | Putative pre-mRNA-splicing factor ATP-dependent RNA helicase DHX15       | 0.34         |
| <b>Q13151</b> | Heterogeneous nuclear ribonucleoprotein A0                               | 0.34         |
| <b>O75533</b> | Splicing factor 3B subunit 1                                             | 0.35         |
| <b>H0Y8X1</b> | Succinate dehydrogenase [ubiquinone] flavoprotein subunit, mitochondrial | 0.35         |
| <b>H0YDK2</b> | Histone-binding protein RBBP4 (Fragment)                                 | 0.35         |
| <b>Q99436</b> | Proteasome subunit beta type-7                                           | 0.35         |
| <b>P36871</b> | Phosphoglucomutase-1                                                     | 0.36         |
| <b>Q9NVP1</b> | ATP-dependent RNA helicase DDX18                                         | 0.36         |
| <b>P35237</b> | Serpin B6                                                                | 0.37         |
| <b>Q13347</b> | Eukaryotic translation initiation factor 3 subunit I                     | 0.38         |
| <b>P30740</b> | Leukocyte elastase inhibitor                                             | 0.38         |
| <b>P48147</b> | Prolyl endopeptidase                                                     | 0.39         |
| <b>E9PBF6</b> | Lamin-B1                                                                 | 0.39         |

|               |                                                                             |      |
|---------------|-----------------------------------------------------------------------------|------|
| <b>Q08211</b> | ATP-dependent RNA helicase A                                                | 0.39 |
| <b>P12004</b> | Proliferating cell nuclear antigen                                          | 0.40 |
| <b>P04080</b> | Cystatin-B                                                                  | 0.40 |
| <b>Q96GQ7</b> | Probable ATP-dependent RNA helicase DDX27                                   | 0.40 |
| <b>P14550</b> | Alcohol dehydrogenase [NADP(+)]                                             | 0.40 |
| <b>Q16795</b> | NADH dehydrogenase [ubiquinone] 1 alpha subcomplex subunit 9, mitochondrial | 0.41 |
| <b>P24539</b> | ATP synthase subunit b, mitochondrial                                       | 0.42 |
| <b>O15427</b> | Monocarboxylate transporter 4                                               | 0.42 |
| <b>Q8TDN6</b> | Ribosome biogenesis protein BRX1 homolog                                    | 0.42 |
| <b>P32119</b> | Peroxiredoxin-2                                                             | 0.43 |
| <b>P22087</b> | rRNA 2'-O-methyltransferase fibrillar                                       | 0.43 |
| <b>P05386</b> | 60S acidic ribosomal protein P1                                             | 0.43 |
| <b>Q15645</b> | Pachytene checkpoint protein 2 homolog                                      | 0.43 |
| <b>O00487</b> | 26S proteasome non-ATPase regulatory subunit 14                             | 0.44 |
| <b>Q6S8J3</b> | POTE ankyrin domain family member E                                         | 0.44 |
| <b>Q09666</b> | Neuroblast differentiation-associated protein AHNAK                         | 0.45 |
| <b>P16152</b> | Carbonyl reductase [NADPH] 1                                                | 0.45 |
| <b>P28072</b> | Proteasome subunit beta type-6                                              | 0.45 |
| <b>Q7KZF4</b> | Staphylococcal nuclease domain-containing protein 1                         | 0.45 |
| <b>P52907</b> | F-actin-capping protein subunit alpha-1                                     | 0.45 |
| <b>P52292</b> | Importin subunit alpha-2                                                    | 0.45 |
| <b>P25787</b> | Proteasome subunit alpha type-2                                             | 0.46 |
| <b>P08574</b> | Cytochrome c1, heme protein, mitochondrial                                  | 0.46 |
| <b>P24534</b> | Elongation factor 1-beta                                                    | 0.46 |
| <b>Q15393</b> | Splicing factor 3B subunit 3                                                | 0.46 |
| <b>P28066</b> | Proteasome subunit alpha type-5                                             | 0.47 |
| <b>P26447</b> | Protein S100-A4                                                             | 0.47 |
| <b>P37802</b> | Transgelin-2                                                                | 0.47 |
| <b>O75874</b> | Isocitrate dehydrogenase [NADP] cytoplasmic                                 | 0.47 |
| <b>P20618</b> | Proteasome subunit beta type-1                                              | 0.48 |
| <b>Q9Y2X3</b> | Nucleolar protein 58                                                        | 0.48 |

|               |                                                      |             |
|---------------|------------------------------------------------------|-------------|
| P62269        | 40S ribosomal protein S18                            | 0.48        |
| O95678        | Keratin, type II cytoskeletal 75                     | 0.48        |
| P80723        | Brain acid soluble protein 1                         | 0.48        |
| Q14566        | DNA replication licensing factor MCM6                | 0.48        |
| P00966        | Argininosuccinate synthase                           | 0.48        |
| P22314        | Ubiquitin-like modifier-activating enzyme 1          | 0.48        |
| P28070        | Proteasome subunit beta type-4                       | 0.48        |
| O75643        | U5 small nuclear ribonucleoprotein 200 kDa helicase  | 0.49        |
| P13010        | X-ray repair cross-complementing protein 5           | 0.49        |
| Q6P2Q9        | Pre-mRNA-processing-splicing factor 8                | 0.49        |
| P49915        | GMP synthase [glutamine-hydrolyzing]                 | 0.49        |
| P30041        | Peroxiredoxin-6                                      | 0.49        |
| E9PBV3        | Suprabasin                                           | 0.50        |
| P53985        | Monocarboxylate transporter 1                        | 0.50        |
| Q99497        | Protein DJ-1                                         | 0.50        |
| P34932        | Heat shock 70 kDa protein 4                          | 0.50        |
| P41091        | Eukaryotic translation initiation factor 2 subunit 3 | 0.50        |
| Q96CS3        | FAS-associated factor 2                              | 0.50        |
| P78527        | DNA-dependent protein kinase catalytic subunit       | 0.51        |
| Q9NQR4        | Omega-amidase NIT2                                   | 0.51        |
| Q9BYZ2        | L-lactate dehydrogenase A-like 6B                    | 0.51        |
| O00116        | Alkyldihydroxyacetonephosphate synthase, peroxisomal | 0.51        |
| O43242        | 26S proteasome non-ATPase regulatory subunit 3       | 0.51        |
| <b>P08238</b> | <b>Heat shock protein HSP 90-beta</b>                | <b>0.51</b> |
| P49257        | Protein ERGIC-53                                     | 0.52        |
| O95373        | Importin-7                                           | 0.52        |
| P31930        | Cytochrome b-c1 complex subunit 1, mitochondrial     | 0.52        |
| P30084        | Enoyl-CoA hydratase, mitochondrial                   | 0.53        |
| P61353        | 60S ribosomal protein L27                            | 0.53        |
| P17931        | Galectin-3                                           | 0.53        |
| P25705        | ATP synthase subunit alpha, mitochondrial            | 0.53        |

|               |                                                       |      |
|---------------|-------------------------------------------------------|------|
| <b>P52597</b> | Heterogeneous nuclear ribonucleoprotein F             | 0.53 |
| <b>Q9BWD1</b> | Acetyl-CoA acetyltransferase, cytosolic               | 0.53 |
| <b>P62081</b> | 40S ribosomal protein S7                              | 0.53 |
| <b>P25398</b> | 40S ribosomal protein S12                             | 0.53 |
| <b>P60903</b> | Protein S100-A10                                      | 0.54 |
| <b>P62854</b> | 40S ribosomal protein S26                             | 0.54 |
| <b>P48637</b> | Glutathione synthetase                                | 0.54 |
| <b>P46777</b> | 60S ribosomal protein L5                              | 0.54 |
| <b>E9PK82</b> | 40S ribosomal protein S3 (Fragment)                   | 0.54 |
| <b>O14980</b> | Exportin-1                                            | 0.54 |
| <b>P43121</b> | Cell surface glycoprotein MUC18                       | 0.54 |
| <b>O43707</b> | Alpha-actinin-4                                       | 0.54 |
| <b>Q14126</b> | Desmoglein-2                                          | 0.54 |
| <b>Q9BVC6</b> | Transmembrane protein 109                             | 0.55 |
| <b>O75131</b> | Copine-3                                              | 0.55 |
| <b>P08754</b> | Guanine nucleotide-binding protein G(k) subunit alpha | 0.55 |
| <b>P23526</b> | Adenosylhomocysteinase                                | 0.55 |
| <b>P62906</b> | 60S ribosomal protein L10a                            | 0.55 |
| <b>P10599</b> | Thioredoxin                                           | 0.55 |
| <b>P49721</b> | Proteasome subunit beta type-2                        | 0.56 |
| <b>P37837</b> | Transaldolase                                         | 0.56 |
| <b>Q6ZS74</b> | Ras-related protein Ral-B                             | 0.56 |
| <b>P00491</b> | Purine nucleoside phosphorylase                       | 0.56 |
| <b>P40429</b> | 60S ribosomal protein L13a                            | 0.56 |
| <b>P30050</b> | 60S ribosomal protein L12                             | 0.57 |
| <b>Q08380</b> | Galectin-3-binding protein                            | 0.57 |
| <b>P26373</b> | 60S ribosomal protein L13                             | 0.57 |
| <b>P27348</b> | 14-3-3 protein theta                                  | 0.57 |
| <b>P17301</b> | Integrin alpha-2                                      | 0.58 |
| <b>P62701</b> | 40S ribosomal protein S4, X isoform                   | 0.58 |
| <b>P31947</b> | 14-3-3 protein sigma                                  | 0.58 |



|        |                                                       |      |
|--------|-------------------------------------------------------|------|
| P15121 | Aldose reductase                                      | 0.59 |
| P08708 | 40S ribosomal protein S17                             | 0.59 |
| P62266 | 40S ribosomal protein S23                             | 0.59 |
| P32970 | CD70 antigen                                          | 0.59 |
| Q01650 | Large neutral amino acids transporter small subunit 1 | 0.59 |
| P21266 | Glutathione S-transferase Mu 3                        | 0.59 |
| Q14151 | Scaffold attachment factor B2                         | 0.59 |
| P50914 | 60S ribosomal protein L14                             | 0.59 |
| Q16719 | Kynureninase                                          | 0.60 |
| Q9BVK6 | Transmembrane emp24 domain-containing protein 9       | 0.60 |
| P46782 | 40S ribosomal protein S5                              | 0.60 |
| Q9BS26 | Endoplasmic reticulum resident protein 44             | 0.60 |
| P38919 | Eukaryotic initiation factor 4A-III                   | 0.60 |
| Q99714 | 3-hydroxyacyl-CoA dehydrogenase type-2                | 0.60 |
| P35268 | 60S ribosomal protein L22                             | 0.60 |
| P46781 | 40S ribosomal protein S9                              | 0.60 |
| P31153 | S-adenosylmethionine synthase isoform type-2          | 0.61 |
| P51571 | Translocon-associated protein subunit delta           | 0.61 |
| P46778 | 60S ribosomal protein L21                             | 0.62 |
| P00403 | Cytochrome c oxidase subunit 2                        | 0.62 |
| P62280 | 40S ribosomal protein S11                             | 0.63 |
| P52888 | Thimet oligopeptidase                                 | 0.63 |
| P06703 | Protein S100-A6                                       | 0.63 |
| P19338 | Nucleolin                                             | 0.63 |
| O00299 | Chloride intracellular channel protein 1              | 0.63 |
| P62249 | 40S ribosomal protein S16                             | 0.63 |
| P84243 | Histone H3.3                                          | 0.63 |
| Q9Y3U8 | 60S ribosomal protein L36                             | 0.63 |
| Q8NFJ5 | Retinoic acid-induced protein 3                       | 0.64 |
| P00492 | Hypoxanthine-guanine phosphoribosyltransferase        | 0.64 |
| P61586 | Transforming protein RhoA                             | 0.64 |

|               |                                                                      |      |
|---------------|----------------------------------------------------------------------|------|
| <b>Q12905</b> | Interleukin enhancer-binding factor 2                                | 0.64 |
| <b>P26038</b> | Moesin                                                               | 0.65 |
| <b>Q00839</b> | Heterogeneous nuclear ribonucleoprotein U                            | 0.65 |
| <b>P07814</b> | Bifunctional glutamate/proline--tRNA ligase                          | 0.66 |
| <b>Q99650</b> | Oncostatin-M-specific receptor subunit beta                          | 0.66 |
| <b>P05198</b> | Eukaryotic translation initiation factor 2 subunit 1                 | 0.66 |
| <b>H7BZJ3</b> | Thioredoxin (Fragment)                                               | 0.66 |
| <b>P49755</b> | Transmembrane emp24 domain-containing protein 10                     | 0.66 |
| <b>Q562R1</b> | Beta-actin-like protein 2                                            | 0.66 |
| <b>P62263</b> | 40S ribosomal protein S14                                            | 0.67 |
| <b>Q07021</b> | Complement component 1 Q subcomponent-binding protein, mitochondrial | 0.67 |
| <b>I3L4N8</b> | Actin, cytoplasmic 2 (Fragment)                                      | 0.68 |
| <b>P58107</b> | Epiplakin                                                            | 0.68 |
| <b>P13667</b> | Protein disulfide-isomerase A4                                       | 0.68 |
| <b>P14625</b> | Endoplasmic                                                          | 0.68 |
| <b>P13639</b> | Elongation factor 2                                                  | 0.69 |
| <b>Q96AG4</b> | Leucine-rich repeat-containing protein 59                            | 0.69 |
| <b>P35579</b> | Myosin-9                                                             | 0.71 |
| <b>F5H867</b> | 4F2 cell-surface antigen heavy chain (Fragment)                      | 0.71 |
| <b>Q9Y6M5</b> | Zinc transporter 1                                                   | 0.71 |
| <b>P11717</b> | Cation-independent mannose-6-phosphate receptor                      | 0.72 |
| <b>P21796</b> | Voltage-dependent anion-selective channel protein 1                  | 0.72 |
| <b>Q15365</b> | Poly(rC)-binding protein 1                                           | 0.72 |
| <b>Q15738</b> | Sterol-4-alpha-carboxylate 3-dehydrogenase, decarboxylating          | 0.72 |
| <b>Q969H8</b> | UPF0556 protein C19orf10                                             | 0.73 |
| <b>P04406</b> | Glyceraldehyde-3-phosphate dehydrogenase                             | 0.73 |
| <b>P49327</b> | Fatty acid synthase                                                  | 0.74 |
| <b>Q9H3N1</b> | Thioredoxin-related transmembrane protein 1                          | 0.74 |
| <b>P27797</b> | Calreticulin                                                         | 0.74 |
| <b>P38646</b> | Stress-70 protein, mitochondrial                                     | 0.74 |
| <b>P62805</b> | Histone H4                                                           | 0.75 |

|               |                                                                 |      |
|---------------|-----------------------------------------------------------------|------|
| <b>P04083</b> | Annexin A1                                                      | 0.75 |
| <b>Q9Y490</b> | Talin-1                                                         | 0.75 |
| <b>P46940</b> | Ras GTPase-activating-like protein IQGAP1                       | 0.75 |
| <b>P23284</b> | Peptidyl-prolyl cis-trans isomerase B                           | 0.76 |
| <b>Q15907</b> | Ras-related protein Rab-11B                                     | 0.76 |
| <b>P05556</b> | Integrin beta-1                                                 | 0.77 |
| <b>Q06830</b> | Peroxiredoxin-1                                                 | 0.77 |
| <b>O95573</b> | Long-chain-fatty-acid--CoA ligase 3                             | 0.78 |
| <b>P00505</b> | Aspartate aminotransferase, mitochondrial                       | 0.78 |
| <b>P30043</b> | Flavin reductase (NADPH)                                        | 0.78 |
| <b>P43007</b> | Neutral amino acid transporter A                                | 0.79 |
| <b>P55809</b> | Succinyl-CoA:3-ketoacid coenzyme A transferase 1, mitochondrial | 0.79 |
| <b>Q14764</b> | Major vault protein                                             | 0.79 |
| <b>P54920</b> | Alpha-soluble NSF attachment protein                            | 0.81 |
| <b>Q13011</b> | Delta(3,5)-Delta(2,4)-dienoyl-CoA isomerase, mitochondrial      | 0.81 |
| <b>P23458</b> | Tyrosine-protein kinase JAK1                                    | 0.82 |
| <b>P12277</b> | Creatine kinase B-type                                          | 0.82 |
| <b>Q9Y5M8</b> | Signal recognition particle receptor subunit beta               | 0.82 |
| <b>P01891</b> | HLA class I histocompatibility antigen, A-68 alpha chain        | 0.82 |
| <b>Q9UBS4</b> | DnaJ homolog subfamily B member 11                              | 0.83 |
| <b>O96008</b> | Mitochondrial import receptor subunit TOM40 homolog             | 0.83 |
| <b>P07195</b> | L-lactate dehydrogenase B chain                                 | 0.84 |
| <b>P84095</b> | Rho-related GTP-binding protein RhoG                            | 0.84 |
| <b>P68371</b> | Tubulin beta-4B chain                                           | 0.86 |
| <b>O15173</b> | Membrane-associated progesterone receptor component 2           | 0.86 |
| <b>Q96QK1</b> | Vacuolar protein sorting-associated protein 35                  | 0.87 |
| <b>Q01581</b> | Hydroxymethylglutaryl-CoA synthase, cytoplasmic                 | 0.87 |
| <b>B4DXP9</b> | Alpha-centractin                                                | 0.88 |
| <b>P55072</b> | Transitional endoplasmic reticulum ATPase                       | 0.88 |
| <b>P61026</b> | Ras-related protein Rab-10                                      | 0.91 |
| <b>P60842</b> | Eukaryotic initiation factor 4A-I                               | 0.92 |

|               |                                                                          |      |
|---------------|--------------------------------------------------------------------------|------|
| <b>Q9UQ80</b> | Proliferation-associated protein 2G4                                     | 0.93 |
| <b>Q9Y678</b> | Coatomer subunit gamma-1                                                 | 0.93 |
| <b>Q9H853</b> | Putative tubulin-like protein alpha-4B                                   | 0.94 |
| <b>Q9Y696</b> | Chloride intracellular channel protein 4                                 | 0.95 |
| <b>Q02790</b> | Peptidyl-prolyl cis-trans isomerase FKBP4                                | 0.96 |
| <b>Q8TEM1</b> | Nuclear pore membrane glycoprotein 210                                   | 0.96 |
| <b>Q13162</b> | Peroxiredoxin-4                                                          | 0.97 |
| <b>Q9Y617</b> | Phosphoserine aminotransferase                                           | 1.00 |
| <b>P56199</b> | Integrin alpha-1                                                         | 1.00 |
| <b>P04843</b> | Dolichyl-diphosphooligosaccharide--protein glycosyltransferase subunit 1 | 1.02 |
| <b>P06733</b> | Alpha-enolase                                                            | 1.02 |
| <b>P07737</b> | Profilin-1                                                               | 1.02 |
| <b>P04792</b> | Heat shock protein beta-1                                                | 1.02 |
| <b>P35579</b> | Myosin-9                                                                 | 1.03 |
| <b>Q92616</b> | Translational activator GCN1                                             | 1.03 |
| <b>O75396</b> | Vesicle-trafficking protein SEC22b                                       | 1.04 |
| <b>Q04917</b> | 14-3-3 protein eta                                                       | 1.05 |
| <b>Q8NF37</b> | Lysophosphatidylcholine acyltransferase 1                                | 1.06 |
| <b>Q9UBF2</b> | Coatomer subunit gamma-2                                                 | 1.10 |
| <b>P11169</b> | Solute carrier family 2, facilitated glucose transporter member 3        | 1.12 |
| <b>Q9UL25</b> | Ras-related protein Rab-21                                               | 1.14 |
| <b>P61981</b> | 14-3-3 protein gamma                                                     | 1.14 |
| <b>Q15758</b> | Neutral amino acid transporter B(0)                                      | 1.16 |
| <b>Q15181</b> | Inorganic pyrophosphatase                                                | 1.17 |
| <b>P18669</b> | Phosphoglycerate mutase 1                                                | 1.18 |
| <b>Q9UQE7</b> | Structural maintenance of chromosomes protein 3                          | 1.28 |
| <b>P11021</b> | 78 kDa glucose-regulated protein                                         | 1.29 |
| <b>P05141</b> | ADP/ATP translocase 2                                                    | 1.33 |
| <b>P05362</b> | Intercellular adhesion molecule 1                                        | 1.33 |
| <b>P05161</b> | Ubiquitin-like protein ISG15                                             | 1.37 |
| <b>P12236</b> | ADP/ATP translocase 3                                                    | 1.38 |

|               |                                                          |      |
|---------------|----------------------------------------------------------|------|
| <b>P41250</b> | Glycine--tRNA ligase                                     | 1.48 |
| <b>P49588</b> | Alanine--tRNA ligase, cytoplasmic                        | 1.55 |
| <b>P35232</b> | Prohibitin                                               | 1.62 |
| <b>O43175</b> | D-3-phosphoglycerate dehydrogenase                       | 1.74 |
| <b>P49411</b> | Elongation factor Tu, mitochondrial                      | 1.82 |
| <b>P42704</b> | Leucine-rich PPR motif-containing protein, mitochondrial | 2.15 |
| <b>P10809</b> | 60 kDa heat shock protein, mitochondrial                 | 2.73 |

\*: Heavy/Light means the protein expression ratio of PI4KII  $\alpha$  RNAi MCF-7 cells to Control cells.

**Table S2. Protein targets identified by SILAC and LC-MS/MS for control MCF-7 cells (sample 3) and combined inhibition MCF-7 cells (sample 4).**

| Accession     | Description                                         | Heavy/Light* |
|---------------|-----------------------------------------------------|--------------|
| Q09666        | Neuroblast differentiation-associated protein AHNAK | 0.21         |
| Q15459        | Splicing factor 3A subunit 1                        | 0.28         |
| P16401        | Histone H1.5                                        | 0.29         |
| Q92945        | Far upstream element-binding protein 2              | 0.34         |
| Q9UNX4        | WD repeat-containing protein 3                      | 0.34         |
| Q96PK6        | RNA-binding protein 14                              | 0.36         |
| <b>Q94776</b> | <b>Metastasis-associated protein MTA2</b>           | <b>0.38</b>  |
| Q05048        | Cleavage stimulation factor subunit 1               | 0.41         |
| O15213        | WD repeat-containing protein 46                     | 0.43         |
| P14866        | Heterogeneous nuclear ribonucleoprotein L           | 0.43         |
| Q8NI36        | WD repeat-containing protein 36                     | 0.44         |
| H7C267        | Pescadillo homolog (Fragment)                       | 0.45         |
| Q15393        | Splicing factor 3B subunit 3                        | 0.45         |
| P08670        | Vimentin                                            | 0.46         |
| P46063        | ATP-dependent DNA helicase Q1                       | 0.46         |
| Q12996        | Cleavage stimulation factor subunit 3               | 0.46         |
| Q9BV38        | WD repeat-containing protein 18                     | 0.46         |
| P15924        | Desmoplakin                                         | 0.47         |
| F6XZQ7        | Glutathione S-transferase Mu 2                      | 0.48         |
| P26599        | Polypyrimidine tract-binding protein 1              | 0.48         |
| P11387        | DNA topoisomerase 1                                 | 0.48         |
| <b>P09874</b> | <b>Poly [ADP-ribose] polymerase 1</b>               | <b>0.48</b>  |
| Q01082        | Spectrin beta chain, non-erythrocytic 1             | 0.48         |
| <b>P49327</b> | <b>Fatty acid synthase</b>                          | <b>0.49</b>  |
| P62750        | 60S ribosomal protein L23a                          | 0.50         |
| P08579        | U2 small nuclear ribonucleoprotein B                | 0.51         |
| P04792        | Heat shock protein beta-1                           | 0.51         |

|          |                                                                                               |       |
|----------|-----------------------------------------------------------------------------------------------|-------|
| P12270   | Nucleoprotein TPR                                                                             | 0.51  |
| Q2TAY7   | WD40 repeat-containing protein SMU1                                                           | 0.51  |
| Q15050   | Ribosome biogenesis regulatory protein homolog                                                | 0.52  |
| P12277   | Creatine kinase B-type                                                                        | 0.53  |
| P32119   | Peroxiredoxin-2                                                                               | 0.54  |
| P23246   | Splicing factor, proline- and glutamine-rich                                                  | 0.54  |
| Q9BUQ8   | Probable ATP-dependent RNA helicase DDX23                                                     | 0.54  |
| P17066   | Heat shock 70 kDa protein 6                                                                   | 0.55  |
| Q92499   | ATP-dependent RNA helicase DDX1                                                               | 0.55  |
| Q9P258   | Protein RCC2                                                                                  | 0.56  |
| Q9Y224   | UPF0568 protein C14orf166                                                                     | 0.56  |
| P13010   | X-ray repair cross-complementing protein 5                                                    | 0.56  |
| P49736   | DNA replication licensing factor MCM2                                                         | 0.56  |
| P80723   | Brain acid soluble protein 1                                                                  | 0.56  |
| P38919   | Eukaryotic initiation factor 4A-III                                                           | 0.57  |
| Q12905   | Interleukin enhancer-binding factor 2                                                         | 0.57  |
| Q9NS69   | Mitochondrial import receptor subunit TOM22 homolog                                           | 0.57  |
| Q15269   | Periodic tryptophan protein 2 homolog                                                         | 0.58  |
| O75533   | Splicing factor 3B subunit 1                                                                  | 0.58  |
| Q13907-2 | Isoform 2 of Isopentenyl-diphosphate Delta-isomerase 1                                        | 0.59  |
| Q08945   | FACT complex subunit SSRP1                                                                    | 0.59  |
| Q9GZL7   | Ribosome biogenesis protein WDR12                                                             | 0.59  |
| O60264   | SWI/SNF-related matrix-associated actin-dependent regulator of chromatin subfamily A member 5 | 0.602 |
| P62304   | Small nuclear ribonucleoprotein E                                                             | 0.60  |
| Q15397   | Pumilio domain-containing protein KIAA0020                                                    | 0.61  |
| Q8IY81   | pre-rRNA processing protein FTSJ3                                                             | 0.61  |
| O43809   | Cleavage and polyadenylation specificity factor subunit 5                                     | 0.61  |
| P52907   | F-actin-capping protein subunit alpha-1                                                       | 0.61  |
| Q00839   | Heterogeneous nuclear ribonucleoprotein U                                                     | 0.61  |
| Q08211   | ATP-dependent RNA helicase A                                                                  | 0.62  |

|               |                                                     |      |
|---------------|-----------------------------------------------------|------|
| <b>Q7KZF4</b> | Staphylococcal nuclease domain-containing protein 1 | 0.62 |
| <b>Q9Y3T9</b> | Nucleolar complex protein 2 homolog                 | 0.63 |
| <b>Q14683</b> | Structural maintenance of chromosomes protein 1A    | 0.63 |
| <b>Q05639</b> | Elongation factor 1-alpha 2                         | 0.64 |
| <b>O75691</b> | Small subunit processome component 20 homolog       | 0.64 |
| <b>Q8IWA0</b> | WD repeat-containing protein 75                     | 0.64 |
| <b>Q9Y678</b> | Coatomer subunit gamma-1                            | 0.64 |
| <b>Q13151</b> | Heterogeneous nuclear ribonucleoprotein A0          | 0.65 |
| <b>O15144</b> | Actin-related protein 2/3 complex subunit 2         | 0.65 |
| <b>P15121</b> | Aldose reductase                                    | 0.65 |
| <b>Q96GQ7</b> | Probable ATP-dependent RNA helicase DDX27           | 0.65 |
| <b>P52292</b> | Importin subunit alpha-2                            | 0.66 |
| <b>P56182</b> | Ribosomal RNA processing protein 1 homolog A        | 0.66 |
| <b>Q12788</b> | Transducin beta-like protein 3                      | 0.66 |
| <b>P23284</b> | Peptidyl-prolyl cis-trans isomerase B               | 0.66 |
| <b>O75531</b> | Barrier-to-autointegration factor                   | 0.67 |
| <b>Q9Y2P8</b> | RNA 3'-terminal phosphate cyclase-like protein      | 0.67 |
| <b>Q9NVP1</b> | ATP-dependent RNA helicase DDX18                    | 0.67 |
| <b>P16083</b> | Ribosyldihydroxycotinamide dehydrogenase [quinone]  | 0.68 |
| <b>P20700</b> | Lamin-B1                                            | 0.68 |
| <b>Q9Y5B9</b> | FACT complex subunit SPT16                          | 0.68 |
| <b>Q06203</b> | Amidophosphoribosyltransferase                      | 0.69 |
| <b>O00148</b> | ATP-dependent RNA helicase DDX39A                   | 0.69 |
| <b>O43818</b> | U3 small nucleolar RNA-interacting protein 2        | 0.69 |
| <b>Q03701</b> | CCAAT/enhancer-binding protein zeta                 | 0.70 |
| <b>Q6P2Q9</b> | Pre-mRNA-processing-splicing factor 8               | 0.70 |
| <b>P37802</b> | Transgelin-2                                        | 0.71 |
| <b>P30740</b> | Leukocyte elastase inhibitor                        | 0.71 |
| <b>P08574</b> | Cytochrome c1, heme protein, mitochondrial          | 0.72 |
| <b>Q9UQE7</b> | Structural maintenance of chromosomes protein 3     | 0.72 |
| <b>Q9Y2W1</b> | Thyroid hormone receptor-associated protein 3       | 0.72 |



|               |                                                             |      |
|---------------|-------------------------------------------------------------|------|
| <b>Q14690</b> | Protein RRP5 homolog                                        | 0.72 |
| <b>P53004</b> | Biliverdin reductase A                                      | 0.72 |
| <b>Q15365</b> | Poly(rC)-binding protein 1                                  | 0.72 |
| <b>Q9Y5J1</b> | U3 small nucleolar RNA-associated protein 18 homolog        | 0.73 |
| <b>P35237</b> | Serpin B6                                                   | 0.74 |
| <b>P36871</b> | Phosphoglucomutase-1                                        | 0.74 |
| <b>Q8TDN6</b> | Ribosome biogenesis protein BRX1 homolog                    | 0.74 |
| <b>O00232</b> | 26S proteasome non-ATPase regulatory subunit 12             | 0.74 |
| <b>P08238</b> | Heat shock protein HSP 90-beta                              | 0.75 |
| <b>E9PBF6</b> | Lamin-B1                                                    | 0.75 |
| <b>Q15738</b> | Sterol-4-alpha-carboxylate 3-dehydrogenase, decarboxylating | 0.75 |
| <b>O60812</b> | Heterogeneous nuclear ribonucleoprotein C-like 1            | 0.75 |
| <b>P05783</b> | Keratin, type I cytoskeletal 18                             | 0.76 |
| <b>O00567</b> | Nucleolar protein 56                                        | 0.77 |
| <b>P04080</b> | Cystatin-B                                                  | 0.77 |
| <b>Q9Y295</b> | Developmentally-regulated GTP-binding protein 1             | 0.78 |
| <b>Q92979</b> | Ribosomal RNA small subunit methyltransferase NEP1          | 0.78 |
| <b>P31949</b> | Protein S100-A11                                            | 0.78 |
| <b>Q96DG6</b> | Carboxymethylenebutenolidase homolog                        | 0.78 |
| <b>Q9NV31</b> | U3 small nucleolar ribonucleoprotein protein IMP3           | 0.78 |
| <b>P05386</b> | 60S acidic ribosomal protein P1                             | 0.78 |
| <b>P09382</b> | Galectin-1                                                  | 0.78 |
| <b>Q86U38</b> | Nucleolar protein 9                                         | 0.78 |
| <b>P25815</b> | Protein S100-P                                              | 0.79 |
| <b>Q02790</b> | Peptidyl-prolyl cis-trans isomerase FKBP4                   | 0.79 |
| <b>Q9BYZ2</b> | L-lactate dehydrogenase A-like 6B                           | 0.79 |
| <b>P49207</b> | 60S ribosomal protein L34                                   | 0.79 |
| <b>Q9NYH9</b> | U3 small nucleolar RNA-associated protein 6 homolog         | 0.79 |
| <b>P22314</b> | Ubiquitin-like modifier-activating enzyme 1                 | 0.81 |
| <b>P26038</b> | Moesin                                                      | 0.81 |
| <b>P26447</b> | Protein S100-A4                                             | 0.81 |

|               |                                                                            |      |
|---------------|----------------------------------------------------------------------------|------|
| <b>O43143</b> | Putative pre-mRNA-splicing factor ATP-dependent RNA helicase DHX15         | 0.81 |
| <b>P48047</b> | ATP synthase subunit O, mitochondrial                                      | 0.82 |
| <b>P29317</b> | Ephrin type-A receptor 2                                                   | 0.82 |
| <b>P31947</b> | 14-3-3 protein sigma                                                       | 0.82 |
| <b>P30086</b> | Phosphatidylethanolamine-binding protein 1                                 | 0.82 |
| <b>P34932</b> | Heat shock 70 kDa protein 4                                                | 0.83 |
| <b>P58107</b> | Epiplakin                                                                  | 0.83 |
| <b>Q9BZK3</b> | Putative nascent polypeptide-associated complex subunit alpha-like protein | 0.83 |
| <b>Q9Y2X3</b> | Nucleolar protein 58                                                       | 0.83 |
| <b>O60287</b> | Nucleolar pre-ribosomal-associated protein 1                               | 0.83 |
| <b>F5H0T1</b> | Stress-induced-phosphoprotein 1                                            | 0.83 |
| <b>P28066</b> | Proteasome subunit alpha type-5                                            | 0.84 |
| <b>P28072</b> | Proteasome subunit beta type-6                                             | 0.84 |
| <b>P35232</b> | Prohibitin                                                                 | 0.84 |
| <b>P62424</b> | 60S ribosomal protein L7a                                                  | 0.84 |
| <b>P49721</b> | Proteasome subunit beta type-2                                             | 0.85 |
| <b>P62854</b> | 40S ribosomal protein S26                                                  | 0.86 |
| <b>P18669</b> | Phosphoglycerate mutase 1                                                  | 0.86 |
| <b>P00491</b> | Purine nucleoside phosphorylase                                            | 0.86 |
| <b>P26373</b> | 60S ribosomal protein L13                                                  | 0.86 |
| <b>P07195</b> | L-lactate dehydrogenase B chain                                            | 0.87 |
| <b>P21796</b> | Voltage-dependent anion-selective channel protein 1                        | 0.87 |
| <b>Q01581</b> | Hydroxymethylglutaryl-CoA synthase, cytoplasmic                            | 0.87 |
| <b>Q92621</b> | Nuclear pore complex protein Nup205                                        | 0.88 |
| <b>P62081</b> | 40S ribosomal protein S7                                                   | 0.88 |
| <b>Q06830</b> | Peroxiredoxin-1                                                            | 0.88 |
| <b>E9PCK7</b> | RRP12-like protein                                                         | 0.89 |
| <b>Q99436</b> | Proteasome subunit beta type-7                                             | 0.89 |
| <b>Q99497</b> | Protein DJ-1                                                               | 0.89 |
| <b>P31153</b> | S-adenosylmethionine synthase isoform type-2                               | 0.89 |
| <b>P06744</b> | Glucose-6-phosphate isomerase                                              | 0.90 |

|               |                                                       |      |
|---------------|-------------------------------------------------------|------|
| <b>Q9UL46</b> | Proteasome activator complex subunit 2                | 0.90 |
| <b>P20618</b> | Proteasome subunit beta type-1                        | 0.90 |
| <b>P30041</b> | Peroxiredoxin-6                                       | 0.90 |
| <b>P30050</b> | 60S ribosomal protein L12                             | 0.90 |
| <b>P78527</b> | DNA-dependent protein kinase catalytic subunit        | 0.90 |
| <b>Q9NV06</b> | DDB1- and CUL4-associated factor 13                   | 0.90 |
| <b>Q9Y230</b> | RuvB-like 2                                           | 0.90 |
| <b>P06703</b> | Protein S100-A6                                       | 0.91 |
| <b>P25705</b> | ATP synthase subunit alpha, mitochondrial             | 0.91 |
| <b>P49257</b> | Protein ERGIC-53                                      | 0.91 |
| <b>A6NDG6</b> | Phosphoglycolate phosphatase                          | 0.91 |
| <b>P61586</b> | Transforming protein RhoA                             | 0.91 |
| <b>P62263</b> | 40S ribosomal protein S14                             | 0.91 |
| <b>Q562R1</b> | Beta-actin-like protein 2                             | 0.91 |
| <b>P23921</b> | Ribonucleoside-diphosphate reductase large subunit    | 0.92 |
| <b>P51571</b> | Translocon-associated protein subunit delta           | 0.92 |
| <b>P04406</b> | Glyceraldehyde-3-phosphate dehydrogenase              | 0.92 |
| <b>P42166</b> | Lamina-associated polypeptide 2, isoform alpha        | 0.92 |
| <b>P62277</b> | 40S ribosomal protein S13                             | 0.92 |
| <b>P06733</b> | Alpha-enolase                                         | 0.92 |
| <b>P42766</b> | 60S ribosomal protein L35                             | 0.92 |
| <b>O00299</b> | Chloride intracellular channel protein 1              | 0.92 |
| <b>O95336</b> | 6-phosphogluconolactonase                             | 0.92 |
| <b>P07737</b> | Profilin-1                                            | 0.92 |
| <b>P13639</b> | Elongation factor 2                                   | 0.92 |
| <b>O75131</b> | Copine-3                                              | 0.93 |
| <b>P08754</b> | Guanine nucleotide-binding protein G(k) subunit alpha | 0.93 |
| <b>P47914</b> | 60S ribosomal protein L29                             | 0.93 |
| <b>P08708</b> | 40S ribosomal protein S17                             | 0.93 |
| <b>P25787</b> | Proteasome subunit alpha type-2                       | 0.93 |
| <b>P30084</b> | Enoyl-CoA hydratase, mitochondrial                    | 0.93 |

|               |                                                                             |      |
|---------------|-----------------------------------------------------------------------------|------|
| <b>P0CG39</b> | POTE ankyrin domain family member J                                         | 0.94 |
| <b>P35268</b> | 60S ribosomal protein L22                                                   | 0.94 |
| <b>P41091</b> | Eukaryotic translation initiation factor 2 subunit 3                        | 0.94 |
| <b>Q01813</b> | 6-phosphofructokinase type C                                                | 0.94 |
| <b>Q8N726</b> | Cyclin-dependent kinase inhibitor 2A, isoform 4                             | 0.94 |
| <b>P18124</b> | 60S ribosomal protein L7                                                    | 0.94 |
| <b>P25398</b> | 40S ribosomal protein S12                                                   | 0.94 |
| <b>Q9H9B4</b> | Sideroflexin-1                                                              | 0.94 |
| <b>P46940</b> | Ras GTPase-activating-like protein IQGAP1                                   | 0.95 |
| <b>Q9BQ39</b> | ATP-dependent RNA helicase DDX50                                            | 0.95 |
| <b>P24534</b> | Elongation factor 1-beta                                                    | 0.95 |
| <b>P12004</b> | Proliferating cell nuclear antigen                                          | 0.96 |
| <b>Q16719</b> | Kynureninase                                                                | 0.96 |
| <b>P52597</b> | Heterogeneous nuclear ribonucleoprotein F                                   | 0.96 |
| <b>P62269</b> | 40S ribosomal protein S18                                                   | 0.96 |
| <b>P61254</b> | 60S ribosomal protein L26                                                   | 0.96 |
| <b>Q14019</b> | Coactosin-like protein                                                      | 0.96 |
| <b>F5H1L6</b> | Serine/threonine-protein phosphatase PP1-alpha catalytic subunit (Fragment) | 0.97 |
| <b>P16152</b> | Carbonyl reductase [NADPH] 1                                                | 0.97 |
| <b>P46777</b> | 60S ribosomal protein L5                                                    | 0.97 |
| <b>Q15181</b> | Inorganic pyrophosphatase                                                   | 0.97 |
| <b>P61313</b> | 60S ribosomal protein L15                                                   | 0.98 |
| <b>Q9HAV0</b> | Guanine nucleotide-binding protein subunit beta-4                           | 0.99 |
| <b>P51153</b> | Ras-related protein Rab-13                                                  | 0.99 |
| <b>O75489</b> | NADH dehydrogenase [ubiquinone] iron-sulfur protein 3, mitochondrial        | 0.99 |
| <b>I3L4N8</b> | Actin, cytoplasmic 2 (Fragment)                                             | 0.99 |
| <b>P00367</b> | Glutamate dehydrogenase 1, mitochondrial                                    | 0.99 |
| <b>Q9Y3U8</b> | 60S ribosomal protein L36                                                   | 0.99 |
| <b>P62249</b> | 40S ribosomal protein S16                                                   | 0.99 |
| <b>E7ES52</b> | Cyclin-dependent kinase inhibitor 1B                                        | 1.00 |
| <b>P21266</b> | Glutathione S-transferase Mu 3                                              | 1.00 |

|                 |                                                                    |      |
|-----------------|--------------------------------------------------------------------|------|
| <b>P60903</b>   | Protein S100-A10                                                   | 1.00 |
| <b>Q96AG4</b>   | Leucine-rich repeat-containing protein 59                          | 1.00 |
| <b>Q8TD16-2</b> | Isoform 2 of Protein bicaudal D homolog 2                          | 1.00 |
| <b>P00441</b>   | Superoxide dismutase [Cu-Zn]                                       | 1.01 |
| <b>P62280</b>   | 40S ribosomal protein S11                                          | 1.01 |
| <b>P62266</b>   | 40S ribosomal protein S23                                          | 1.01 |
| <b>Q9UBI6</b>   | Guanine nucleotide-binding protein G(I)/G(S)/G(O) subunit gamma-12 | 1.01 |
| <b>P46782</b>   | 40S ribosomal protein S5                                           | 1.02 |
| <b>P55072</b>   | Transitional endoplasmic reticulum ATPase                          | 1.02 |
| <b>P15311</b>   | Ezrin                                                              | 1.02 |
| <b>P53985</b>   | Monocarboxylate transporter 1                                      | 1.02 |
| <b>P53999</b>   | Activated RNA polymerase II transcriptional coactivator p15        | 1.02 |
| <b>P62701</b>   | 40S ribosomal protein S4, X isoform                                | 1.02 |
| <b>P23458</b>   | Tyrosine-protein kinase JAK1                                       | 1.03 |
| <b>Q92616</b>   | Translational activator GCN1                                       | 1.03 |
| <b>P61353</b>   | 60S ribosomal protein L27                                          | 1.03 |
| <b>P62906</b>   | 60S ribosomal protein L10a                                         | 1.03 |
| <b>P31689</b>   | DnaJ homolog subfamily A member 1                                  | 1.03 |
| <b>P27348</b>   | 14-3-3 protein theta                                               | 1.04 |
| <b>P30041</b>   | Peroxiredoxin-6                                                    | 1.04 |
| <b>P23526</b>   | Adenosylhomocysteinase                                             | 1.04 |
| <b>P50914</b>   | 60S ribosomal protein L14                                          | 1.04 |
| <b>P14625</b>   | Endoplasmin                                                        | 1.04 |
| <b>P62841</b>   | 40S ribosomal protein S15                                          | 1.04 |
| <b>Q9NR45</b>   | Sialic acid synthase                                               | 1.04 |
| <b>Q969H8</b>   | UPF0556 protein C19orf10                                           | 1.05 |
| <b>P28070</b>   | Proteasome subunit beta type-4                                     | 1.05 |
| <b>P43121</b>   | Cell surface glycoprotein MUC18                                    | 1.05 |
| <b>Q969Q0</b>   | 60S ribosomal protein L36a-like                                    | 1.05 |
| <b>P35579</b>   | Myosin-9                                                           | 1.05 |
| <b>O76003</b>   | Glutaredoxin-3                                                     | 1.06 |

|        |                                                                             |      |
|--------|-----------------------------------------------------------------------------|------|
| P55795 | Heterogeneous nuclear ribonucleoprotein H2                                  | 1.06 |
| P61006 | Ras-related protein Rab-8A                                                  | 1.07 |
| O00487 | 26S proteasome non-ATPase regulatory subunit 14                             | 1.07 |
| O43707 | Alpha-actinin-4                                                             | 1.07 |
| Q99714 | 3-hydroxyacyl-CoA dehydrogenase type-2                                      | 1.08 |
| O75643 | U5 small nuclear ribonucleoprotein 200 kDa helicase                         | 1.08 |
| P46778 | 60S ribosomal protein L21                                                   | 1.08 |
| Q04917 | 14-3-3 protein eta                                                          | 1.08 |
| P40429 | 60S ribosomal protein L13a                                                  | 1.09 |
| Q12907 | Vesicular integral-membrane protein VIP36                                   | 1.09 |
| Q15006 | ER membrane protein complex subunit 2                                       | 1.09 |
| P68371 | Tubulin beta-4B chain                                                       | 1.10 |
| Q9H3N1 | Thioredoxin-related transmembrane protein 1                                 | 1.10 |
| H0YKF0 | Electron transfer flavoprotein subunit alpha, mitochondrial (Fragment)      | 1.11 |
| P37837 | Transaldolase                                                               | 1.11 |
| P07814 | Bifunctional glutamate/proline--tRNA ligase                                 | 1.11 |
| P05198 | Eukaryotic translation initiation factor 2 subunit 1                        | 1.11 |
| Q01105 | Protein SET                                                                 | 1.12 |
| P62805 | Histone H4                                                                  | 1.12 |
| Q9UMS4 | Pre-mRNA-processing factor 19                                               | 1.12 |
| P05556 | Integrin beta-1                                                             | 1.12 |
| P22087 | rRNA 2'-O-methyltransferase fibrillar                                       | 1.13 |
| Q16795 | NADH dehydrogenase [ubiquinone] 1 alpha subcomplex subunit 9, mitochondrial | 1.14 |
| P19338 | Nucleolin                                                                   | 1.14 |
| Q9H4A6 | Golgi phosphoprotein 3                                                      | 1.14 |
| P04083 | Annexin A1                                                                  | 1.15 |
| Q9Y5M8 | Signal recognition particle receptor subunit beta                           | 1.15 |
| P55809 | Succinyl-CoA:3-ketoacid coenzyme A transferase 1, mitochondrial             | 1.15 |
| P84243 | Histone H3.3                                                                | 1.15 |
| Q13641 | Trophoblast glycoprotein                                                    | 1.16 |
| P11166 | Solute carrier family 2, facilitated glucose transporter member 1           | 1.16 |

|               |                                                                          |       |
|---------------|--------------------------------------------------------------------------|-------|
| <b>P02792</b> | Ferritin light chain                                                     | 1.16  |
| <b>Q14764</b> | Major vault protein                                                      | 1.17  |
| <b>P48637</b> | Glutathione synthetase                                                   | 1.17  |
| <b>P30040</b> | Endoplasmic reticulum resident protein 29                                | 1.188 |
| <b>Q10589</b> | Bone marrow stromal antigen 2                                            | 1.19  |
| <b>O96008</b> | Mitochondrial import receptor subunit TOM40 homolog                      | 1.19  |
| <b>P31930</b> | Cytochrome b-c1 complex subunit 1, mitochondrial                         | 1.19  |
| <b>O75874</b> | Isocitrate dehydrogenase [NADP] cytoplasmic                              | 1.19  |
| <b>P54920</b> | Alpha-soluble NSF attachment protein                                     | 1.19  |
| <b>Q71D13</b> | Histone H3.2                                                             | 1.20  |
| <b>P00505</b> | Aspartate aminotransferase, mitochondrial                                | 1.20  |
| <b>P60842</b> | Eukaryotic initiation factor 4A-I                                        | 1.21  |
| <b>P50148</b> | Guanine nucleotide-binding protein G(q) subunit alpha                    | 1.22  |
| <b>P00966</b> | Argininosuccinate synthase                                               | 1.22  |
| <b>P04843</b> | Dolichyl-diphosphooligosaccharide--protein glycosyltransferase subunit 1 | 1.23  |
| <b>Q96QK1</b> | Vacuolar protein sorting-associated protein 35                           | 1.24  |
| <b>O14980</b> | Exportin-1                                                               | 1.24  |
| <b>Q9BVK6</b> | Transmembrane emp24 domain-containing protein 9                          | 1.24  |
| <b>Q13011</b> | Delta(3,5)-Delta(2,4)-dienoyl-CoA isomerase, mitochondrial               | 1.25  |
| <b>P27797</b> | Calreticulin                                                             | 1.26  |
| <b>Q01650</b> | Large neutral amino acids transporter small subunit 1                    | 1.26  |
| <b>H7BZJ3</b> | Thioredoxin (Fragment)                                                   | 1.28  |
| <b>P12236</b> | ADP/ATP translocase 3                                                    | 1.28  |
| <b>P00492</b> | Hypoxanthine-guanine phosphoribosyltransferase                           | 1.29  |
| <b>P30043</b> | Flavin reductase (NADPH)                                                 | 1.29  |
| <b>O95373</b> | Importin-7                                                               | 1.31  |
| <b>O60568</b> | Procollagen-lysine,2-oxoglutarate 5-dioxygenase 3                        | 1.32  |
| <b>P62745</b> | Rho-related GTP-binding protein RhoB                                     | 1.34  |
| <b>Q07065</b> | Cytoskeleton-associated protein 4                                        | 1.34  |
| <b>P10599</b> | Thioredoxin                                                              | 1.35  |
| <b>P40261</b> | Nicotinamide N-methyltransferase                                         | 1.35  |

|               |                                                                        |      |
|---------------|------------------------------------------------------------------------|------|
| <b>Q16740</b> | Putative ATP-dependent Clp protease proteolytic subunit, mitochondrial | 1.36 |
| <b>O95573</b> | Long-chain-fatty-acid--CoA ligase 3                                    | 1.37 |
| <b>Q96HE7</b> | ERO1-like protein alpha                                                | 1.37 |
| <b>P48556</b> | 26S proteasome non-ATPase regulatory subunit 8                         | 1.38 |
| <b>P01891</b> | HLA class I histocompatibility antigen, A-68 alpha chain               | 1.38 |
| <b>P61981</b> | 14-3-3 protein gamma                                                   | 1.39 |
| <b>P67936</b> | Tropomyosin alpha-4 chain                                              | 1.40 |
| <b>P61106</b> | Ras-related protein Rab-14                                             | 1.41 |
| <b>O43681</b> | ATPase ASNA1                                                           | 1.42 |
| <b>O75396</b> | Vesicle-trafficking protein SEC22b                                     | 1.42 |
| <b>H7C3T4</b> | Peroxiredoxin-4 (Fragment)                                             | 1.44 |
| <b>P05141</b> | ADP/ATP translocase 2                                                  | 1.44 |
| <b>Q04837</b> | Single-stranded DNA-binding protein, mitochondrial                     | 1.47 |
| <b>Q9UHV9</b> | Prefoldin subunit 2                                                    | 1.53 |
| <b>P13667</b> | Protein disulfide-isomerase A4                                         | 1.55 |
| <b>Q6UB35</b> | Monofunctional C1-tetrahydrofolate synthase, mitochondrial             | 1.60 |
| <b>Q8NFH3</b> | Nucleoporin Nup43                                                      | 1.60 |
| <b>Q15645</b> | Pachytene checkpoint protein 2 homolog                                 | 1.62 |
| <b>Q8IV08</b> | Phospholipase D3                                                       | 1.62 |
| <b>P24752</b> | Acetyl-CoA acetyltransferase, mitochondrial                            | 1.64 |
| <b>P05161</b> | Ubiquitin-like protein ISG15                                           | 1.66 |
| <b>Q14566</b> | DNA replication licensing factor MCM6                                  | 1.71 |
| <b>P05362</b> | Intercellular adhesion molecule 1                                      | 1.72 |
| <b>O15173</b> | Membrane-associated progesterone receptor component 2                  | 1.78 |
| <b>Q8TEM1</b> | Nuclear pore membrane glycoprotein 210                                 | 1.81 |
| <b>P21266</b> | Glutathione S-transferase Mu 3                                         | 1.84 |
| <b>P61026</b> | Ras-related protein Rab-10                                             | 1.87 |
| <b>P49755</b> | Transmembrane emp24 domain-containing protein 10                       | 1.88 |
| <b>P11021</b> | 78 kDa glucose-regulated protein                                       | 1.97 |
| <b>P49411</b> | Elongation factor Tu, mitochondrial                                    | 2.00 |
| <b>P41250</b> | Glycine--tRNA ligase                                                   | 2.17 |



|               |                                                                      |        |
|---------------|----------------------------------------------------------------------|--------|
| <b>P42704</b> | Leucine-rich PPR motif-containing protein, mitochondrial             | 2.27   |
| <b>Q15758</b> | Neutral amino acid transporter B(0)                                  | 2.32   |
| <b>P24539</b> | ATP synthase subunit b, mitochondrial                                | 2.48   |
| <b>P40939</b> | Trifunctional enzyme subunit alpha, mitochondrial                    | 2.50   |
| <b>Q07021</b> | Complement component 1 Q subcomponent-binding protein, mitochondrial | 2.52   |
| <b>O43175</b> | D-3-phosphoglycerate dehydrogenase                                   | 2.52=3 |
| <b>P10809</b> | 60 kDa heat shock protein, mitochondrial                             | 2.67   |
| <b>Q9Y617</b> | Phosphoserine aminotransferase                                       | 2.87]  |
| <b>P49588</b> | Alanine--tRNA ligase, cytoplasmic                                    | 2.88]  |
| <b>Q14204</b> | Cytoplasmic dynein 1 heavy chain 1                                   | 3.04]  |
| <b>P38646</b> | Stress-70 protein, mitochondrial                                     | 3.48]  |
| <b>E9PPU0</b> | Epiplakin                                                            | 4.29   |

\*: Heavy/Light means the protein expression ratio of PI4KII  $\alpha$  and EGFR dual inhibited MCF-7 cells to Control cells.
